# Supplementary material for: IKKα contributes to UVB-induced VEGF expression by regulating AP-1 transactivation
Source: PubMed Central journal article supplement — Nucleic Acids Res. 2011 Dec 14;40(7):2940–55. doi: 10.1093/nar/gkr1216 (PMC3326327; doi:10.1093/nar/gkr1216), 2011-12-14
Supplement: supp_gkr1216_nar-01260-v-2011-File009.pdf [file supp_gkr1216_nar-01260-v-2011-File009.pdf]

## Figure S1

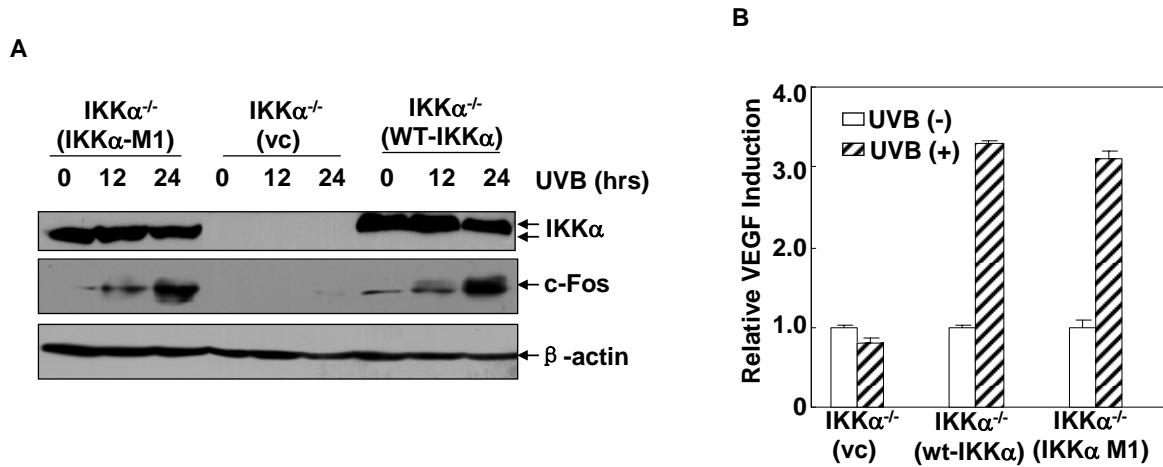

**Figure S1: UVB induces c-Fos expression via IKK $\gamma$ -independent manner.** (A) IKK $\alpha$ -null cells were transfected with the control vector, wild type IKK $\alpha$  or IKK $\alpha$ -M1 expression plasmids, respectively. 36 hrs after transfection, the cells were subjected to UVB irradiation (0.5 kJ/m<sup>2</sup>) and the induction of c-Fos expression was detected at the indicated time points after UVB exposure. (B) IKK $\alpha$ -null cells were transfected with the control vector, wild type IKK $\alpha$  or IKK $\alpha$ -M1 expression plasmids in combination with the VEGF luciferase reporter plasmid, respectively. 36 hrs after transfection, the cells were subjected to UVB irradiation (0.5 kJ/m<sup>2</sup>) and the VEGF luciferase activity was detected at 24 hrs after UVB exposure.

**Figure S2**

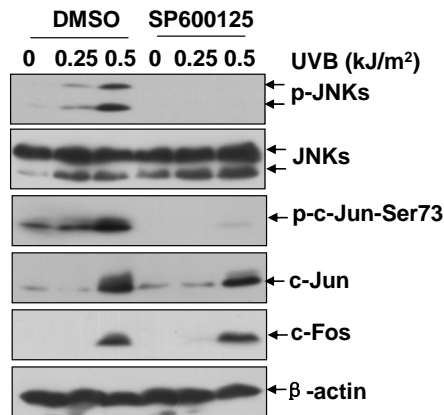

**Figure S2: JNKs are responsible for c-Jun activation, but not c-Fos expression in the UVB response.** WT MEFs were pretreated with SP600125, the specific JNK inhibitor, or its vehicle, followed by exposure to the different doses of UVB. Then the activation of c-Jun and the expression of c-Fos were determined at 12 hrs after UVB exposure.

**Figure S3**

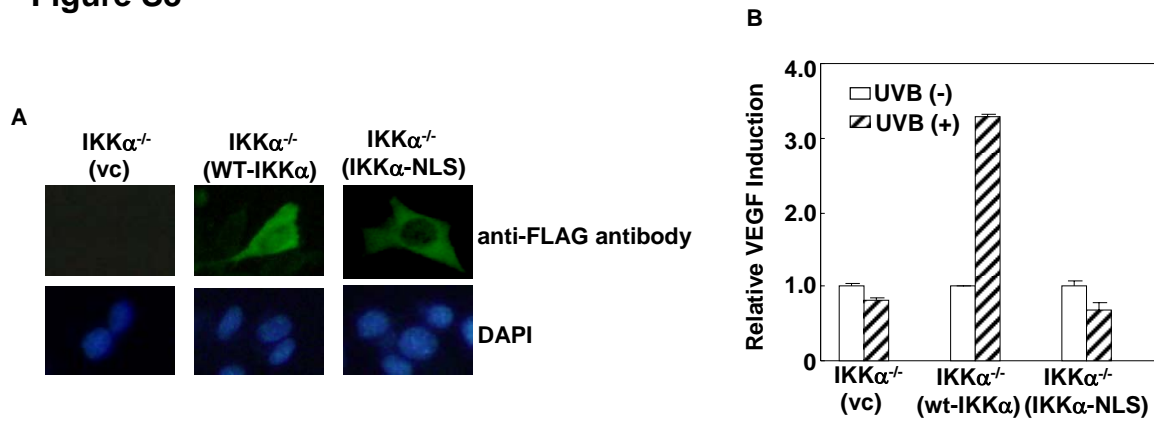

**Figure S3: Nuclear localization of IKK $\alpha$  is critical for VEGF induction in the UVB response.** (A) IKK $\alpha$ -null cells were transfected with the control vector, wild type IKK $\alpha$  or IKK $\alpha$ -NLS expression plasmids, respectively. 36 hrs after transfection, the cells were subjected to immunofluorescence assay to show that wt IKK $\alpha$  localized at both cytoplasm and nucleus; while IKK $\alpha$ -NLS was only cytoplasmic. (B) IKK $\alpha$ -null cells were transfected with the control vector, wild type IKK $\alpha$  or IKK $\alpha$ -NLS expression plasmids in combination with the VEGF luciferase reporter plasmid, respectively. 36 hrs after transfection, the cells were subjected to UVB irradiation (0.5 kJ/m<sup>2</sup>) and the VEGF luciferase activity was detected at 24 hrs after UVB exposure.
